# Supplementary material for: Transcription factor co-expression mediates lineage priming for embryonic and extra-embryonic differentiation
Source: PubMed Central journal article supplement (PMC10874857; doi:10.1016/j.stemcr.2023.12.002), 2024-01-11
Supplement: mmc1.pdf [file mmc1.pdf]

**Stem Cell Reports, Volume 19**

**Supplemental Information**

**Transcription factor co-expression mediates lineage priming for embryonic and extra-embryonic differentiation**

**Alba Redó-Riveiro, Jasmina Al-Mousawi, Madeleine Linneberg-Agerholm, Martin Proks, Marta Perera, Nazmus Salehin, and Joshua M. Brickman**

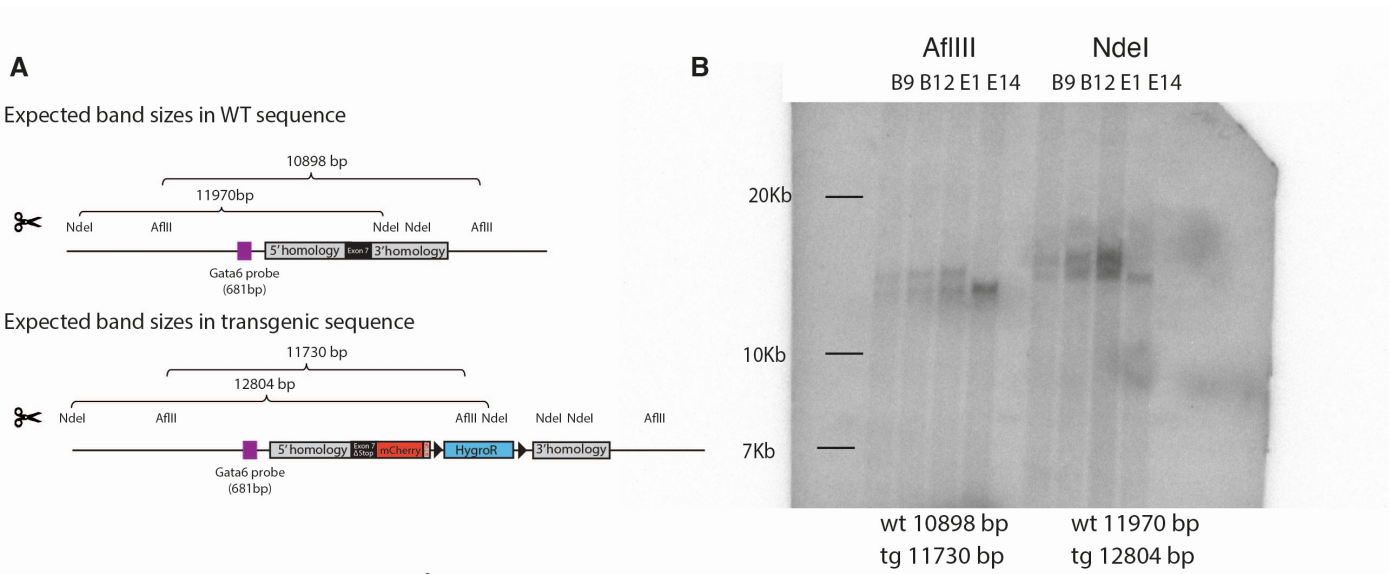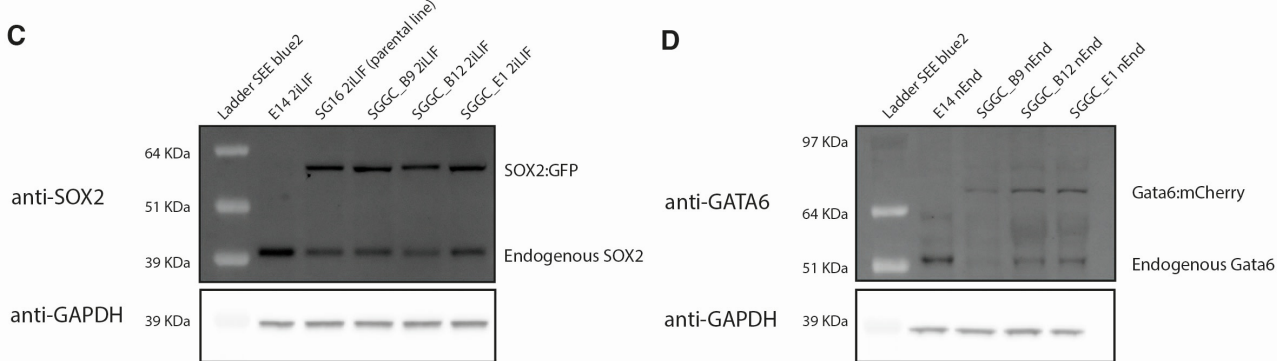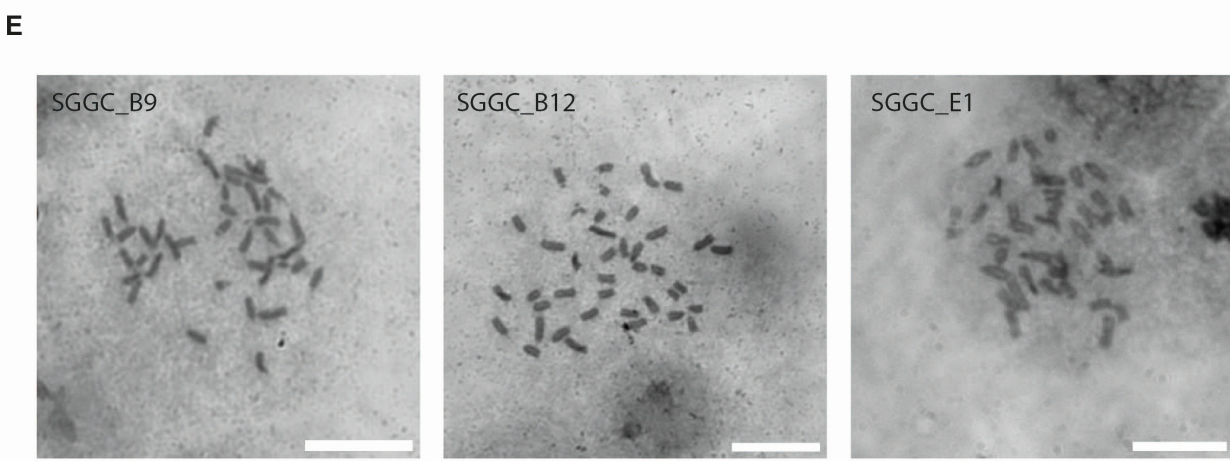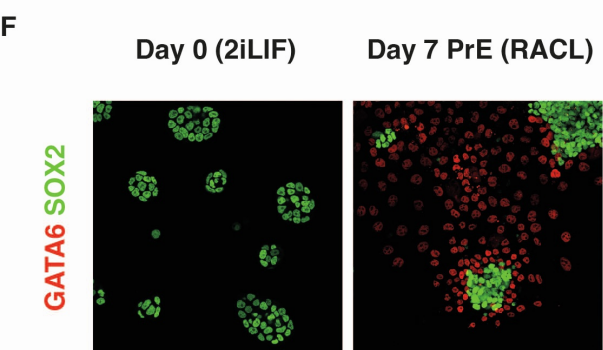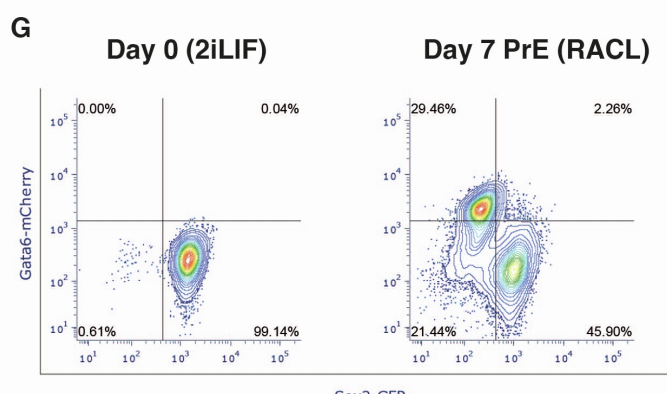

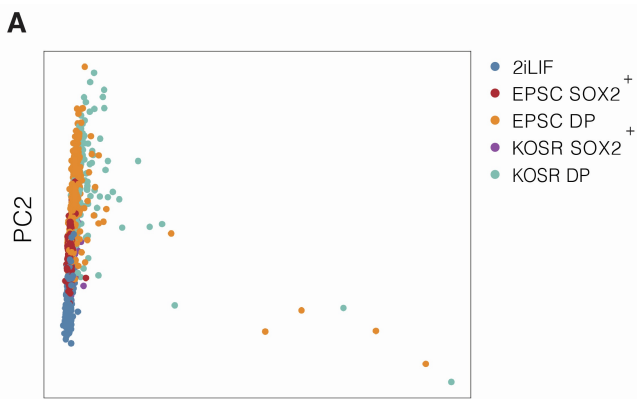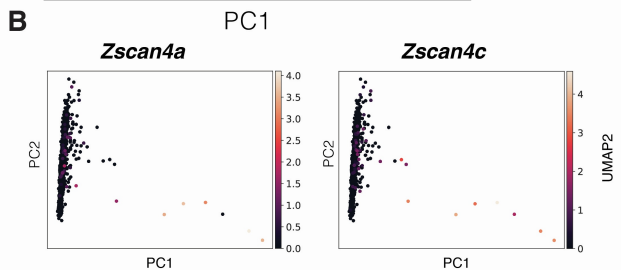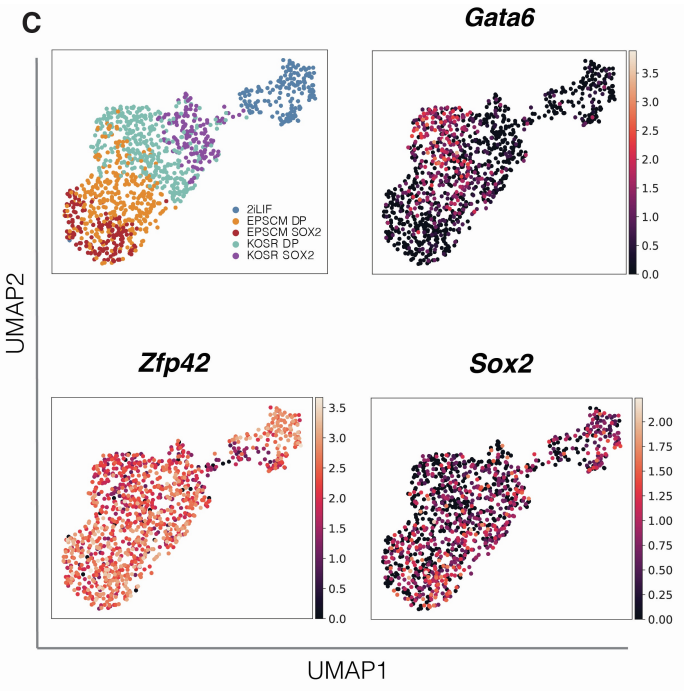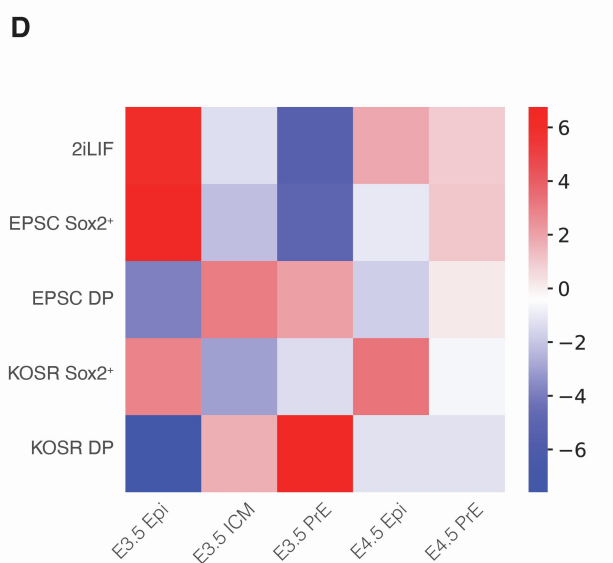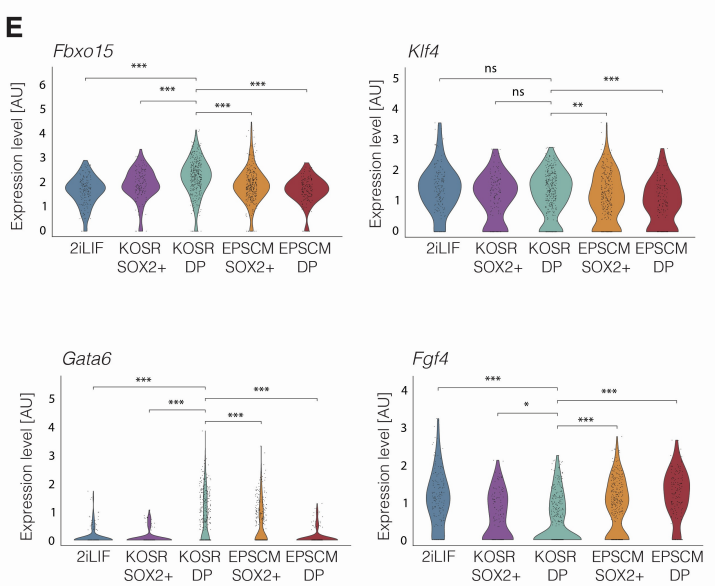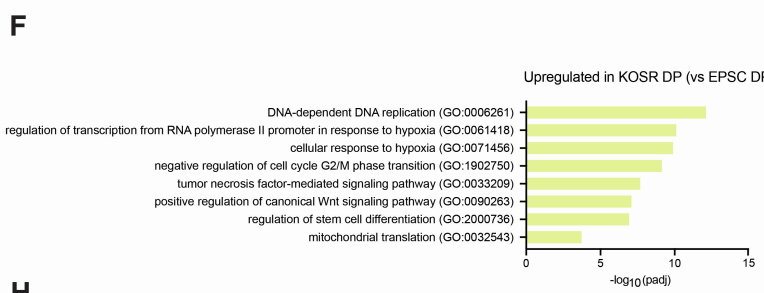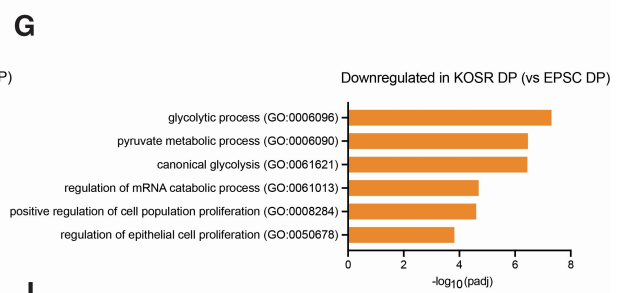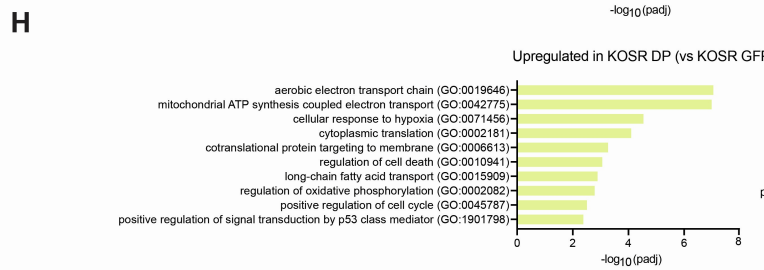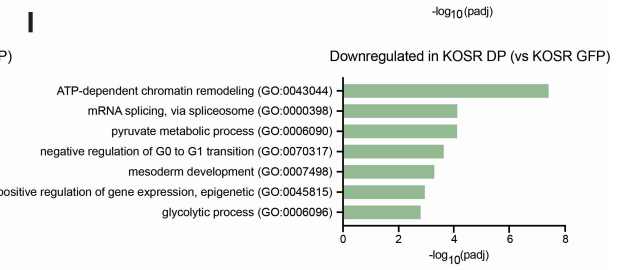

**A** OXPhos genes

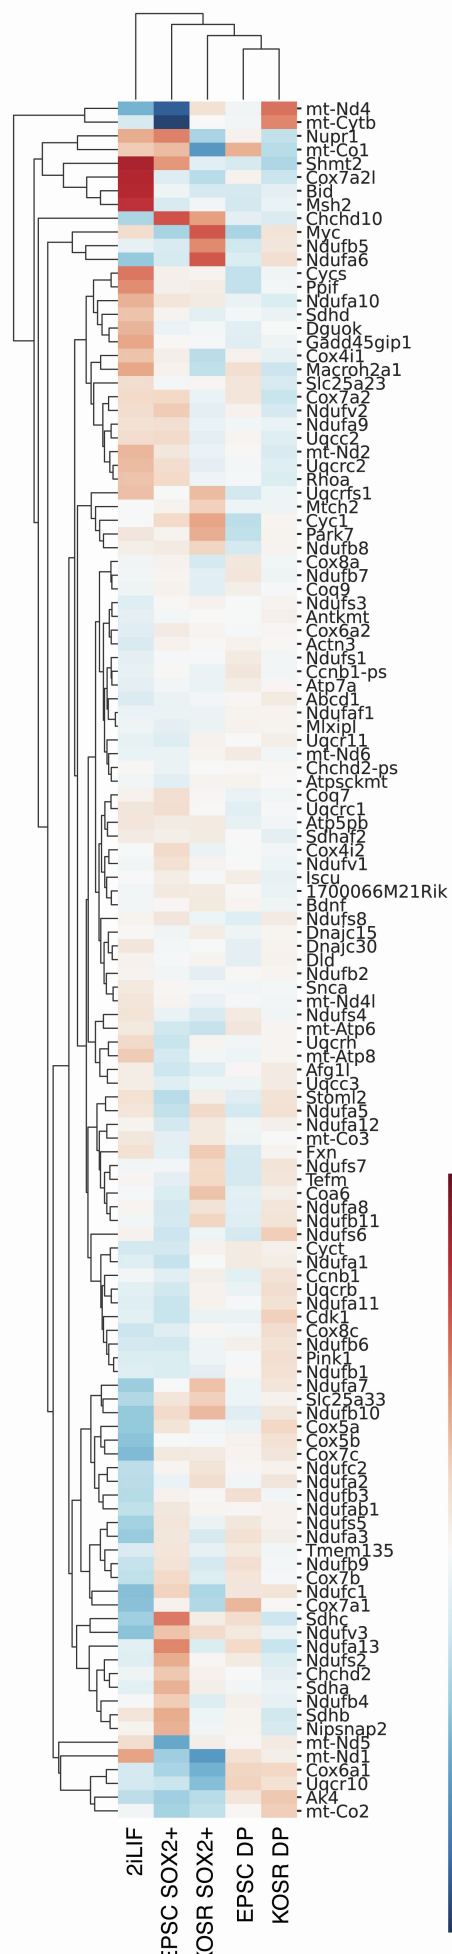

**B** Glycolysis genes

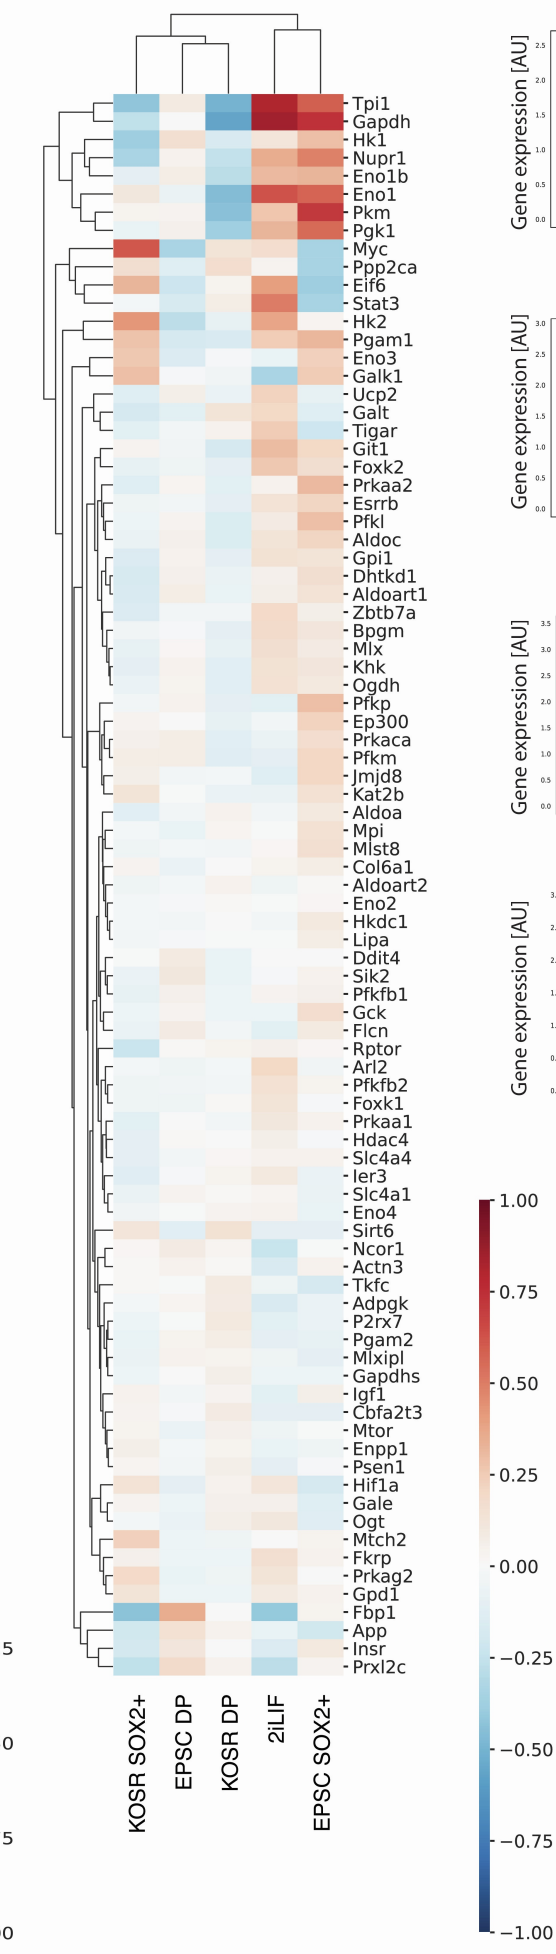

**C** Lipid metabolism genes

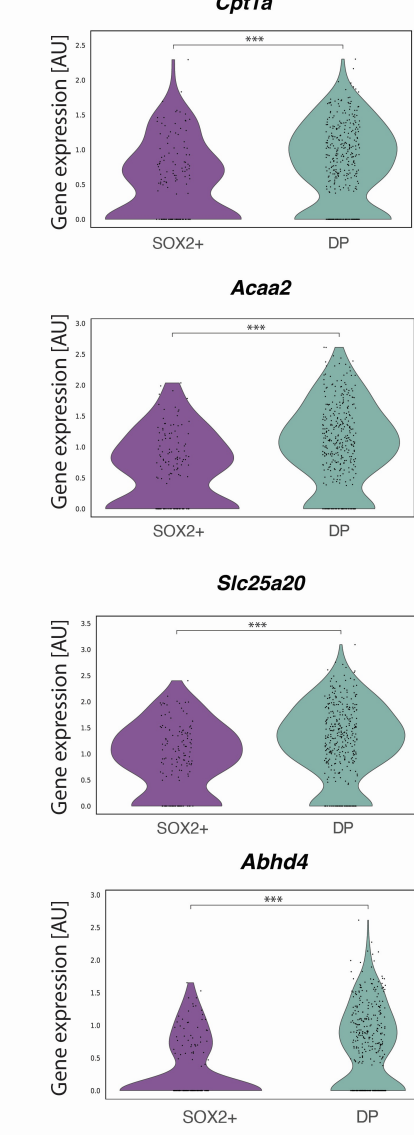



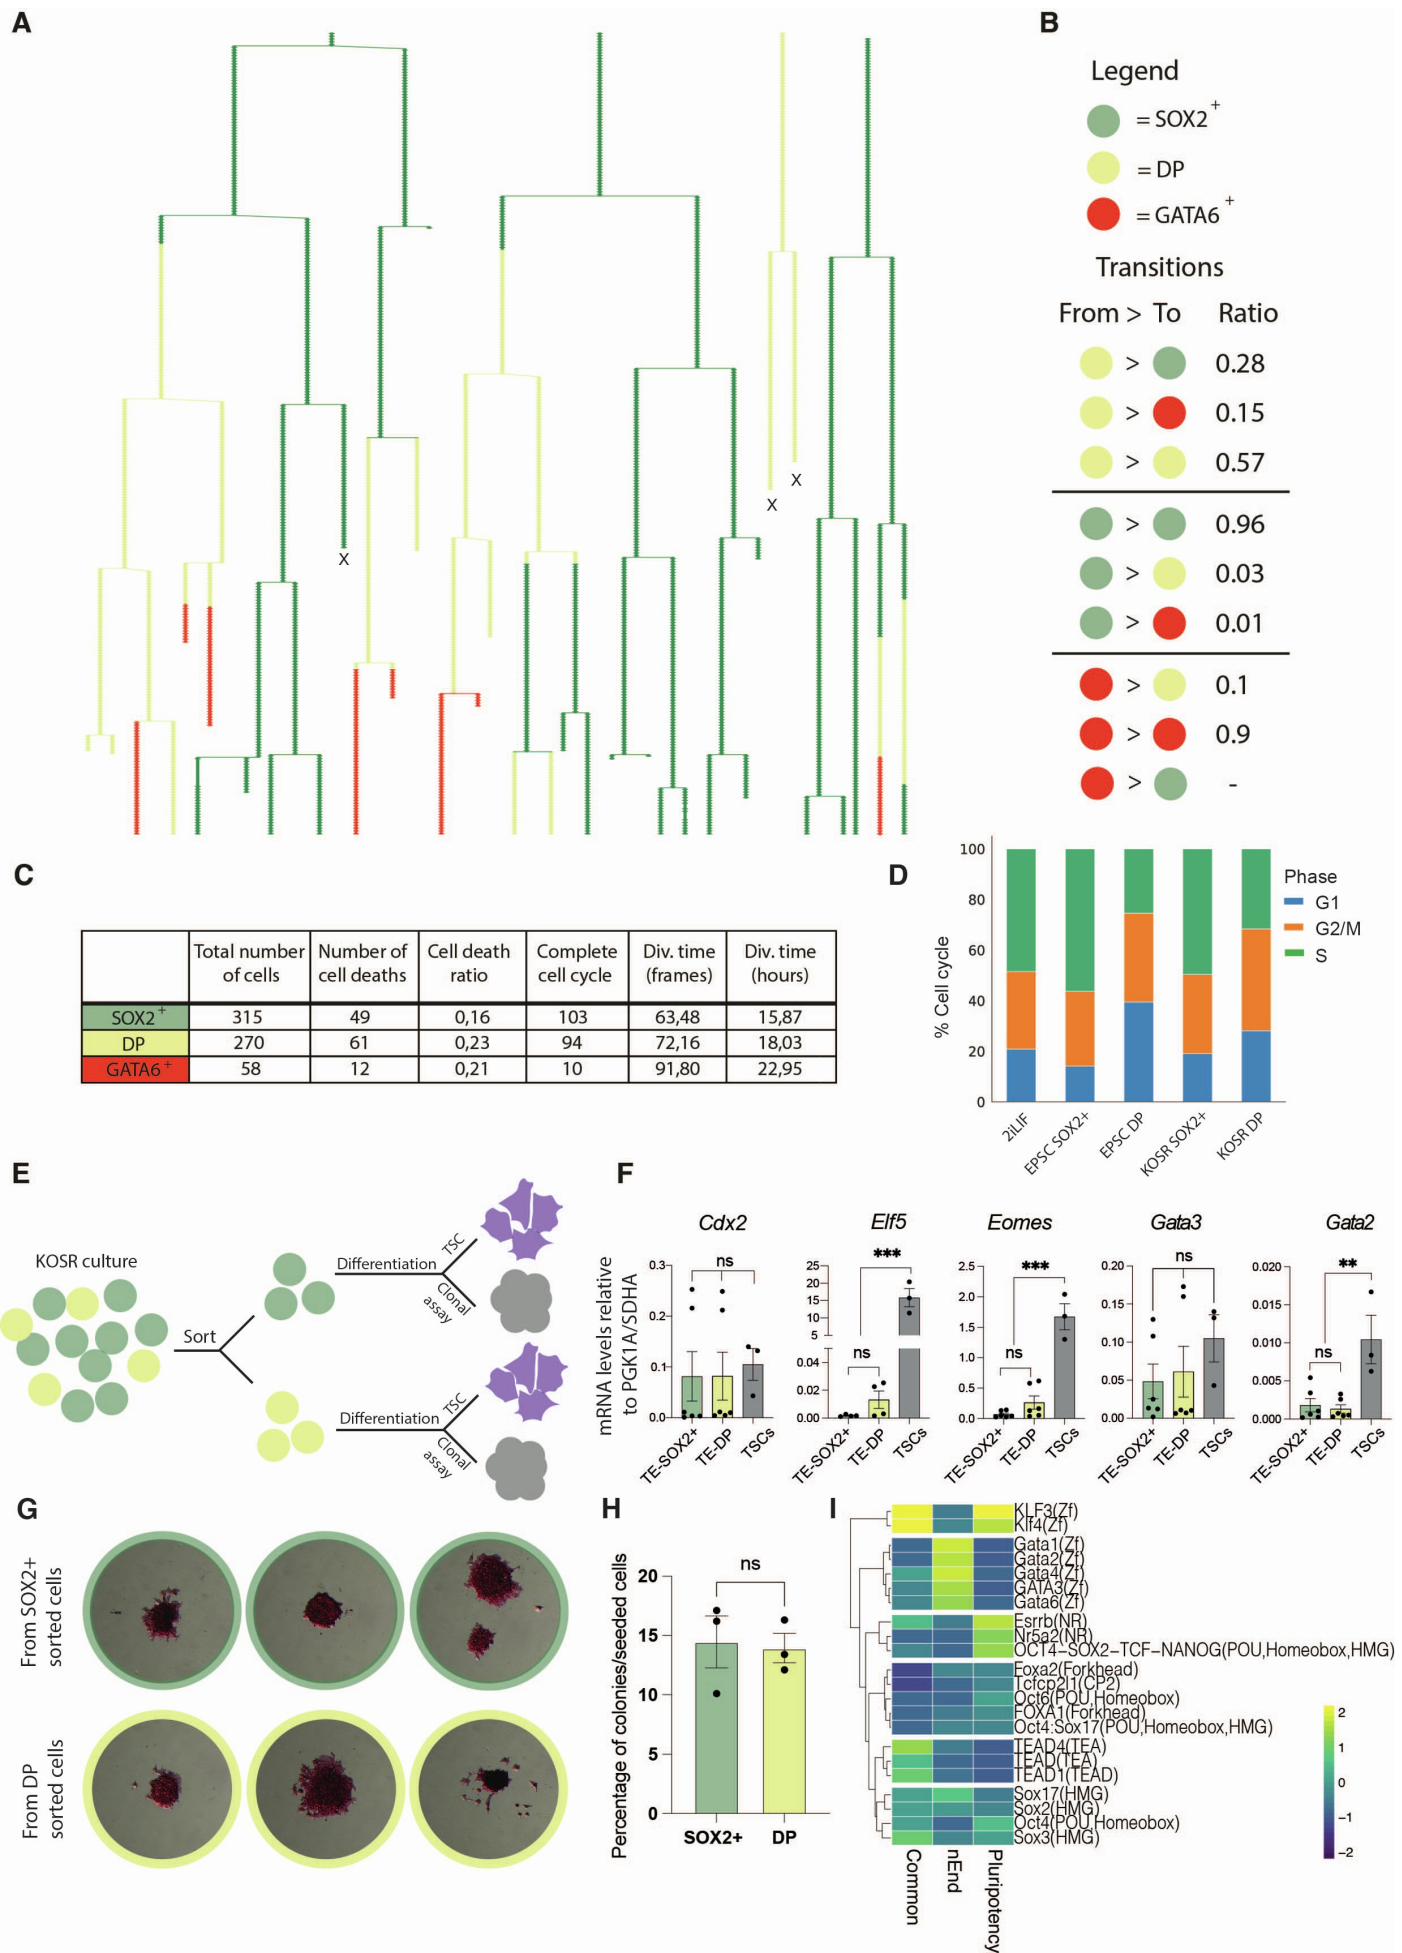

## Supplemental Figure Legends

**Fig. S1. Generation of a post-translational double reporter for SOX2 and GATA6.** **A.** Schematic drawing of the WT and transgenic sequences at the *Gata6* locus, including the *Gata6* probe used for the Southern blot and the predicted band sizes when cut with enzymes NdeI and AflIII. **B.** Southern blot of the external probe (marked in A) for the *Gata6*-mCherry construct. 3 correctly targeted SGGC clones (B9, B12 & E1). **C.** Western blot for SOX2 and GAPDH showing two SOX2 bands (endogenous and GFP-tagged) in all the double reporter lines and in the parental line SG16 in 2iLIF conditions. **D.** Western blot for GATA6 and GAPDH showing 2 GATA6 bands (endogenous and mCherry-tagged) in all the double reporter lines in nEnd conditions. **E.** Bright field images of the correct karyotyping of the 3 SGGC clones. Scale bar = 15 $\mu$ m. Modal number for the 3 clones is 40 chromosomes: SGGC B9 at 77% (7/9 spreads) SGGC B12 at 75% (6/6 spreads) and SGGC E1 at 83% (5/6 spreads). **F.** Representative images of the SGGC lines in 2iLIF (naive ESCs) and at day 7 of PrE differentiation (RACL media). **G.** Representative flow cytometry plots of the SGGC cell line in 2iLIF and day 7 of PrE differentiation (RACL media).

**Fig. S2. Cell populations identified with the SOX2 and GATA6 double reporter.** **A.** PCA showing the first and second principal components. PC1 separates 2CLCs from the rest. **B.** Expression of 2C genes (*Zscan4c*, *Zscan4d*) projected on PCA plot shown in S2A. **C.** UMAP of single cell RNA-seq of sorted populations (top left) overlain with expression of selected markers (*Gata6*, *Zfp42* and *Sox2*). **D.** Heatmap showing normalized residuals post- $\chi^2$  test comparing differences in proportions of the sorted cells mapped to *in vivo* scRNA-seq of pre-implantation blastocysts (Nowotschin et. al 2019). Color scale represents the normalized deviation of observed from expected proportions. **E.** Violin plots depicting 4 selected genes from each relevant stage; E3.5 ICM, E3.5 Epi, E3.5 PrE and E4.5 Epi. The plot shows normalized and log-transformed counts. Wilcoxon statistical test used. ns = non-significant \* = p-value < 0.05 \*\* = p-value < 0.01 and \*\*\* = p-value < 0.001. **F-G.** GO term enrichment for KOSR DP cells compared with EPSCM DP cells. **H-I.** GO term enrichment of KOSR DP compared with KOSR SOX2<sup>+</sup>.

**Fig. S3. Metabolic signatures present in DP SOX2 and GATA6 expressing ESCs.** **A.** Heatmap showing oxidative phosphorylation genes expression in the different media conditions. **B.** Heatmap showing glycolysis genes. **C.** Violin plots with different examples of lipid metabolism genes distribution in DP or SOX2<sup>+</sup> cells in KOSR media. Mann-Whitney U statistical test. \* = p-value 0.01, \*\*\* = p-value 0.001

**Fig S4. Interconversion and differentiation of SOX2 and GATA6 expressing ESCs.** **A.** Representative dendrogram of 4 initial tracked cells with its descendants (from Video S1). A total of 63 individual tracks of 72h were tracked. The x marks cell death. **B.** Ratios of transitions from one cell state to another. **C.** Table with quantification of the timelapse data. **D.** Distribution of the cell cycle phases in different sorted populations based on scRNA-seq data. For each cell, its cell cycle phase was estimated using CellCycleScoring function from Seurat. The barplot depicts cell cycle phase proportion for different cell stages. **E.** Schematic of TSC differentiation and clonal assay after sorting KOSR cells by FACS. **F.** Relative mRNA levels of TSC markers of the sorted SOX2<sup>+</sup> (green bar) or DP (yellow bar) sorted populations after 6 days of TSC differentiation. 2 individual clones were used. Grey bars show control values from Trophoblast stem cells derived from post-implantation embryos. Columns show mean  $\pm$

standard error of the mean (SEM). Statistics show unpaired t-tests. ns = non-significant \* = p-value < 0.05 \*\* = p-value <0.01 and \*\*\* = p-value <0.001. **G.** Representative images of AP-stained colonies after 1 week of clonal growth from SOX2<sup>+</sup> sorted cells (green frame) or DP sorted cells (yellow frame). **H.** Quantification of the AP staining from the clonal assay. **I.** Heatmap of selected motifs across enhancer subsets defined in Figure 3B, with a cutoff of p-value < 0.0005. Scale shows -log<sub>10</sub>(p-value).

#### Tables:

**Table 1 SOX2 and GATA6 binding.** Table shows a list of the closest epiblast genes to the cobound peaks for SOX2 and GATA6 in DP cells. It also shows how many SOX2 and GATA6 motifs we find in these regions. Genes colored in yellow are differentially upregulated in DP over SOX2<sup>+</sup> cells in the scRNA-seq. The ones colored in green are differentially upregulated in SOX2<sup>+</sup> over DP cells.

**Table 2 Characterization of DP SOX2 and GATA6 cobound regions.** Table shows a list of the closest PrE genes to the cobound peaks for SOX2 and GATA6 in DP cells. It also shows how many SOX2 and GATA6 motifs we find in these regions. Genes colored in yellow are differentially upregulated in DP over SOX2<sup>+</sup> cells in the scRNA-seq. The ones colored in green are differentially upregulated in SOX2<sup>+</sup> over DP cells.

**Table 3 Comparison of this study to Thompson *et al.* 2022.** Table compares SOX2 and GATA6 binding peaks from our study with the SOX2 and GATA6 peaks of the GATA6 overexpression time course from Thompson *et al.* 2022.

#### Supplemental experimental procedures

##### Generation of SGGC ESC lines

SOX2:GFP ESCs were plated onto a gelatinised 6-well plates in serum/LIF and lipofected with the linearized Gata6:mCherry-Hygromycin plasmid and the CRISPR plasmid using Lipofectamine2000 (ThermoFisher) following the manufacturer's instructions. After 16 h incubation, the cells were transferred onto 10cm dishes with fresh medium supplemented with Hygromycin to select for colonies successfully integrated. SOX2:GFP ESCs (Anderson *et al.*, 2017) (specifically clone SG16) was used to further target with a Gata6:mCherry construct using CRISPR-Cas technology. The construct contains mCherry tagged immediately after exon 7 of the Gata6 locus, just before the STOP codon and the construct has 3000bp homology arms. We obtained 3 clones (B9, B12 and E1) that were successfully integrated. Clone B9 was generated using CRISPR guide 1 (GCTCTGGCCCTGGCC), which cuts at the last 20nt of the coding sequence of Gata6, and clones B12 and E1 were generated using CRISPR guide 2 (GCACAGAAATCACGCATCGA), which cuts 150 bp after the STOP codon (See Fig. 1A).

SGGC cells were verified by performing immunostaining for SOX2, GATA6, mCherry and GFP, western blot, locus sequencing to screen for unwanted mutations generated by CRISPR, karyotyping and Southern blot. Resistance cassettes can be easily removed using Cre-mediated recombination, however we decided to use the original clones with the resistance cassettes included. All 3 clones give the same reproducible results. All 3 clones were used for the MARSeq scRNA-seq. Clones B9 and B12 presented the highest amount of double positive cells, so these 2 clones were used in all the CUT&RUN, differentiations and morula aggregation experiments.

### **Karyotyping**

SGGC ESCs were expanded until 50-60% confluency, after which they were incubated for 1h in medium containing 10 µg/ml Colcemid (Sigma Aldrich). The medium was collected for separate disposal, and without a PBS washing step, 2 ml of trypsin were added. When the first cells started to detach, the trypsin was inactivated by adding medium. Pelleted cells were resuspended in 2.5 ml hypotonic solution (0.56 % (w/v) KCl and incubated at RT for exactly 6 min. 1 ml of fixative (75 % (v/v) methanol, 25 % (v/v) acetic acid) was added, followed by 1 wash in 1 ml of fixative and 30 min incubation at 4°C. After 2 washes in fixative, cells were carefully resuspended in 200µl fixative and spread onto pre-cleaned poly-L-lysine coated glass slides. Chromosomes were stained for 30 min in filtered 10% Giemsa pH 7.2 solution and imaged using a 63x Oil objective on an inverted Olympus microscope.

### **Southern blot**

Southern Blotting was used to test SGGC clones for correct gene targeting as previously described (Southern, 2006). Gata6:mCherry construct integration was confirmed using both an internal (mCherry) and an external probe. DNA for the external probe was cut using AflIII and NdeI. The DNA for mCherry internal probe was cut using HindIII (Fig. S1A-B). Hybridization of the probe happened at 60°C O/N. The blots were left in the exposure cassette for 48h and developed using a high-resolution Typhoon scanner.

### **Flow cytometry and FACS**

Cells were washed in PBS and brought to single cell suspension using Accutase. Cells were resuspended in 10% FCS/PBS with DAPI (1:10,000) to exclude dead cells. Cells were analyzed using a LSR Fortessa flow cytometer (BD Biosciences) and the FACSDiva (BD Biosciences) software. Cells were sorted by SOX2<sup>+</sup> or DP by FACS using a BD FACS Aria III (BD Biosciences) with a 100µm nozzle and 20psi sheath pressure. The gate between positive and negative populations were set based on the negative population of control ESCs (both E14 and parental line SG16). A forward scatter (FSC) and side scatter (SSC) was used to define a homogeneous population, FSC-H/FSC-W gates were used to exclude doublets, and dead cells were excluded based on DAPI staining. Plots were generated using FCS Express 6.0 (DeNovo Software).

### **Alkaline Phosphatase Staining**

ESCs were plated at clonal density and cultured for 7 days. Alkaline phosphatase staining was carried out as per manufacturer's instructions. Colonies were imaged using a Leica M165 C microscope.

### **ESC and embryo immunostaining**

ESCs were cultured in 8-wells slides (Ibidi) and immunostaining was carried out as previously described (Canham et al., 2010). Primary antibodies are listed in the resource table. Secondary antibodies used are from the Alexa Fluor series (Molecular Probes, ThermoFisher), all 1:2000. Blastocysts were stained by anti-CDX2 (BioGenex MU392A-UC) used at 1:200. Both for blastocyst and E6.5 embryos anti-GATA6 (Cell Signalling Technologies, 5851) was used at 1:200. Both mESCs and embryos were imaged using a confocal Leica SP8.

### **Quantitative PCR with reverse transcription (RT-qPCR)**

Total RNA was collected using the RNeasy Mini Kit (Qiagen). 1µg of total RNA was used for first strand synthesis using SuperScript III reverse transcriptase according to the manufacturer's



instructions. cDNA corresponding to 10ng total RNA was used for RT-qPCR analysis using the Roche LC480 and target amplification was detected with the Universal Probe Library system.

### **scRNA-seq**

Cells were sorted directly into 384-well plates containing lysis buffer which includes the first RT primer and RNase inhibitor, immediately frozen and later processed by the MARS-seq2 protocol (Keren-Shaul et al., 2019). scRNA-seq libraries were sequenced using an Illumina NextSeq500 at a median sequencing depth of 225,000 reads per single cell. Pre-processing was done using nfcore/marsseq pipeline (Proks et al., 2023) with following command: `nextflow run nf-core/marsseq -r 1.0.3 -profile ku_sund_dangpu --with-tower --genome mm10 --velocity --input SCR_20221006/raw/samplesheet.csv --outdir /scratch/ALBA_SB2/`.

### **Time-lapse imaging and cell tracking**

SGGCH2B ESC lines were cultured in KOSR media, on 8-well slides (ibidi) and imaged every 15 minutes across 72h. mCherry, GFP and CY5 fluorescent light channels were recorded in 5% CO<sub>2</sub>, 20% O<sub>2</sub> at 37°C under a Deltavision Widefield Screening microscope. ESCs were seeded at 5000 cells/cm<sup>2</sup> 24h before the beginning of the time lapse in KOSR. We performed manual cell tracking using Imaris v9.5 (Bitplane). Nuclei were segmented using the H2B marker tagged with far red. We measured the SOX2-GFP and GATA6-mCherry fluorescence intensities of a circular area of 50 µm diameter inside the segmented nuclei. For each area measured, we took the median fluorescence intensity as the measure for that given data point. Intensity measurements were linked to its time point and lineage, allowing us to infer the division time for each cell that was tracked, as well as the expression level of both SOX2 and GATA6 in each time point. Only cells with completed cell cycle information were used for calculating the transition analysis. A total of 63 individual tracks of 72h have been tracked.

### **CUT&RUN**

KOSR, nEnd, 2iLIF or NACL cells were grown in their respective media for at least 4 passages. KOSR and nEnd cells were sorted by FACS using a BD FACS Aria III. From KOSR we sorted SOX2<sup>+</sup> and DP cells. From nEnd we sorted GATA6<sup>+</sup> cells. A minimum of 100,000 cells were sorted to proceed with the CUT&RUN protocol. CUT&RUN was performed using an in house purified MNase and following the published protocol (Janssens and Henikoff, 2019). Library preparation was performed following this published protocol (Liu, 2019). The quality of the CUT&RUN libraries was assessed using an Agilent Fragment Analyzer and quantified using Qubit. Sequencing was performed on an Illumina NextSeq 550, up to 48 uniquely barcoded samples were pooled on a High Output flow cell. Samples are sequenced using paired end sequencing. Antibodies used: Sox2-Active Motif 39843, Gata6-Cell Signaling 5851, H3K27ac Abcam-ab4729, H3K4me1 Abcam-ab8895. All used at 1:100 concentration.

### **Downstream analysis of CUT&RUN**

Reads were trimmed to 21bp with Cutadapt (Martin, 2011), mapped to the GRCm38/mm10 mouse reference genome with Bowtie 2 (Langmead and Salzberg, 2012), with options `-X 1000 --no-mixed --no-discordant`. Only uniquely mapped reads with MAPQ>10 were kept using SAMtools v1.9 (Li et al., 2009). Bam files were sorted, deduplicated with Picard v2.9.1 and indexed. Bam files for TFs were subset to contain a maximum fragment length of 150 bp, whereas for histone modifications, all reads were considered. Bedgraphs were generated using bedtools v2.27.1. (Ar and Im, 2010). Bigwig files were generated with bamCoverage



v3.2.0 from DeepTools (Ramírez et al., 2016) and the RPGC option (-bs=1 --normalizeUsing RPKM). Peaks were called using SEACR (Meers et al., 2019), parameters; 'relaxed' for transcription factors and 'Stringent' for histone marks. Peaks were called against a negative IgG control, generated in each experiment for each condition. GREAT was used to annotate peaks to nearest genes and perform GO enrichment (McLean et al., 2010). Motif analysis was performed on select genomic regions using HOMER findMotifsGenome.pl with options -size 75 -mask (Heinz et al., 2010). Genome browser tracks were visualized using Gviz/Fluff (Hahne and Ivanek, 2016). Global TF occupancy across enhancer subsets was plotted by first calculating the coverage at each enhancer summit +/- 1 kB using DeepTools computeMatrix (Ramírez et al., 20) and visualized in R using custom scaling that equalized TF signal across enhancer subsets to assesses the relative TF distribution on enhancers within each condition.

### **Chimera assays**

For chimera assays, H2B:miRFP670 tagged clones SGGCH2B B9.A and B12.B were used. Cells were sorted for SOX2<sup>+</sup> or DP as previously described. Using an aggregation needle (Type DN-09, BLS Ltd., Hungary), 10 to 12 wells were made in 35mm tissue culture Petri dishes. The wells were covered with microdrops of KOSM and mineral oil. The plate was left in the incubator for 1h at 37°C and 5% CO<sub>2</sub> to buffer the medium to the appropriate pH. Live morulae (E2.5) were flushed from the uterus of superovulated C57BL/6NRj female mice by the transgenics platform facility and cultured in KSOM.

DP or SOX2<sup>+</sup> sorted cells were placed at the bottom of the wells and 1 morula was added on top.

Embryos were either cultured for 3 days *in vitro* to the equivalent of E4.5 *in vivo* or transferred to pseudopregnant CD1 females (RjOrl:SWISS) (12 weeks old) for further development, and embryos were harvested at E6.5. Animal work was carried in accordance with European legislation. All work was authorized by and carried out under Project License 2018-15-0201-01520 and 2023-15-0201-01513 issued by the Danish Regulatory Authority.

qPCR primers

|          |                          |
|----------|--------------------------|
| Gata6F   | GGTCTCTACAGCAAGATGAATGG  |
| Gata6R   | TGGCACAGGACAGTCCAAG      |
| Gata4 F  | TTCGCTGTTTCTCCCTCAAG     |
| Gata4 R  | CAATGTTAACGGGTTGTGGA     |
| Gata3 F  | TTATCAAGCCCAAGCGAAG      |
| Gata3 R  | TGGTGGTGGTCTGACAGTTC     |
| Dab2 F   | TCTCAGCCTGCATCTTCTGA     |
| Dab2 R   | TTTGCTCATCTGGATAGTCATCAT |
| Nanog F  | cctccagcagatgcaagaa      |
| Nannog R | gcttgcacttcatccttgg      |
| Oct4 F   | GTTGGAGAAGGTGGAACCAA     |
| Oct4 R   | CTCCTTCTGCAGGGCTTTC      |
| Oct6 F   | catttttcgtttcgttttaccc   |
| Oct6 R   | gagcgcagaccctctctg       |
| Otx2 F   | ggcctcactttgttctgacc     |
| Otx2 R   | aatcaactgccagaatcca      |
| Pdgfra F | AAGACCTGGGCAAGAGGAAC     |
| Pdgfra R | GAACCTGTCTCGATGGCACT     |
| Sox7 F   | gcgagctcagcaagatg        |
| Sox7 R   | gggtctcttctgggacagtg     |
| Sox17 F  | CACAACGCAGAGCTAAGCAA     |
| Sox17 R  | CGCTTCTCTGCCAAGGTC       |
| Cdx2 F   | CACCATCAGGAGGAAAAGTGA    |
| Cdx2 R   | CTGCGGTTCTGAAACCAAAT     |
| Elf5 F   | GCAGCTCTGCAGCATGAC       |
| Elf5 R   | TTCAGCATCATTGAAAAAGGAG   |
| Eomes F  | AAGCTCAAGAAAGGAAACATGC   |
| Eomes R  | ACCGGCACCAAACACTGAGA     |
| Gata2 F  | CTAGGAGTTTGGCTGAAAGGG    |
| Gata2 R  | CTCTGCCAGATTGCCACTG      |

Antibodies

| ANTIBODY | BRAND          | # ID       | CONCENTRATION | USE            |
|----------|----------------|------------|---------------|----------------|
| SOX2     | Active motif   | 39843      | 1:1000        | CUT&RUN        |
| GATA6    | Cell Signaling | 5851       | 1:1000        | CUT&RUN,<br>IF |
| H3K27ac  | Abcam          | ab4729     | 1:1000        | CUT&RUN        |
| H3K4me1  | Abcam          | ab8895     | 1:1000        | CUT&RUN        |
| SOX2     | Santa Cruz     | sc17320    | 1:200         | IF             |
| CDX2     | BioGenex       | MU-392A-UC | 1:200         | IF             |
